# Supplementary material
Source: MDPI journal article supplement (https://www.mdpi.com/2073-4344/9/1/78)
Supplement: s1 [file s1]

Article

# Enzyme-Loaded Mesoporous Silica Particles with Tuning Wettability as a Pickering Catalyst for Enhancing Biocatalysis

Tao Meng, Ruixue Bai, Weihao Wang, Xin Yang, Ting Guo and Yaolei Wang \*

School of Life Sciences and Engineering, Southwest Jiaotong University, Chengdu, Sichuan 610031, China; taomeng@swjtu.edu.cn (T.M.); bairuixue@calb-tech.com (R.B.); wangweihaowwh@163.com (W.W.); yangxin1239@163.com (X.Y.); tt-g-19@163.com (T.G.)

\* Correspondence: wangbatistuta02@163.com; Tel.: +86-28-8760-3202

Received: 2 December 2018; Accepted: 9 January 2019; Published: 14 January 2019

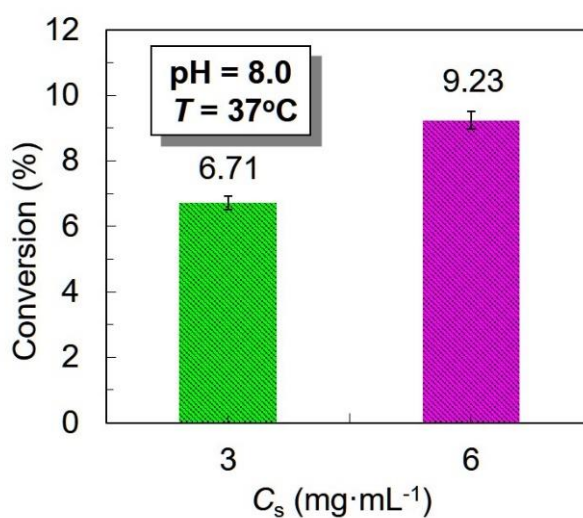

**Figure S1.** Effect of substrate concentration on the conversion with the free PCL.

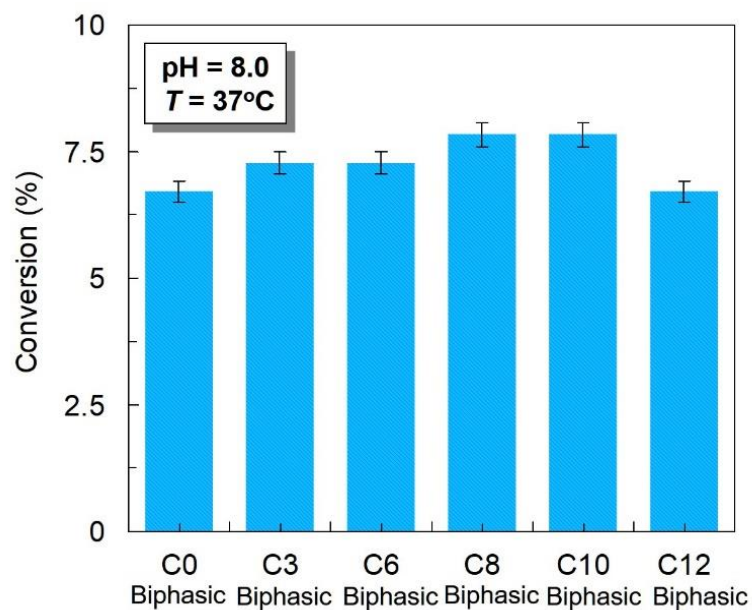

**Figure S2.** Effect of the chain length of silane grafted LMSPs on the conversion of enzymatic reaction catalyzed by the LMSPs\_C0, LMSPs\_C3, LMSPs\_C6, LMSPs\_C8, LMSPs\_C10, LMSPs\_C12 in the paraffin oil-water biphasic system.

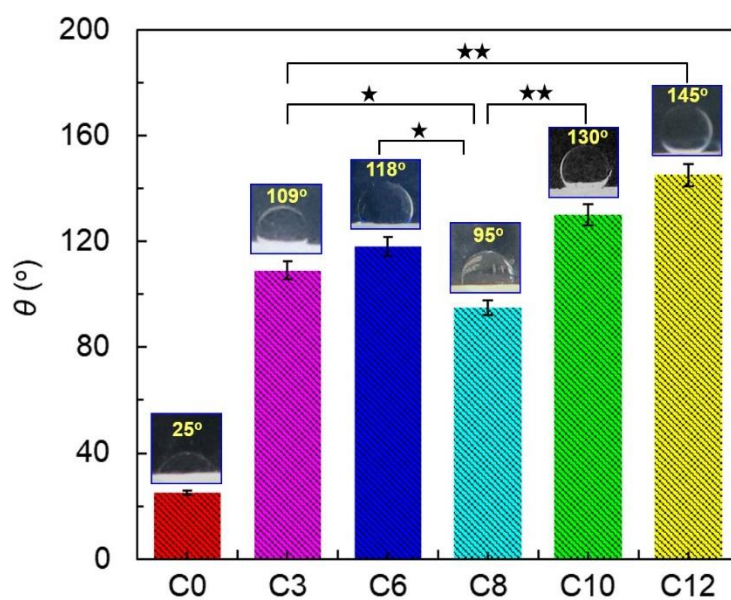

**Figure S3.** TCA of C0, C3, C6, C8, C10 and C12 modified LMSPs. One-way ANOVA and t-tests were used for statistical analysis. Asterisks indicate significant differences. \* $P < 0.05$ , \*\* $P < 0.01$ .

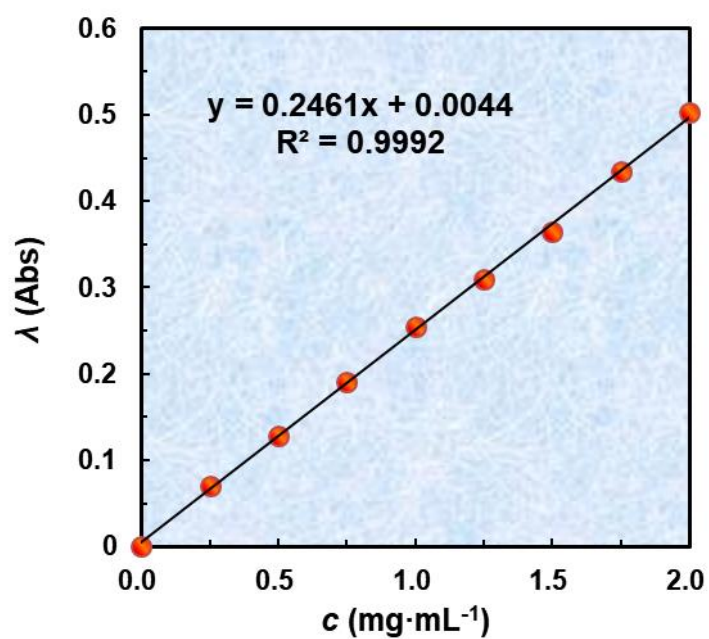

Figure S4 Standard curve of the absorbance of PCL at 205 nm.

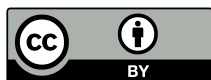

© 2018 by the authors. Submitted for possible open access publication under the terms and conditions of the Creative Commons Attribution (CC BY) license (<http://creativecommons.org/licenses/by/4.0/>).
